# Supplementary material for: Decrypting the Molecular Mechanistic Pathways Delineating the Chemotherapeutic Potential of Ruthenium-Phloretin Complex in Colon Carcinoma Correlated with the Oxidative Status and Increased Apoptotic Events
Source: Hindawi journal article supplement (doi:10.1155/2020/7690845), 2020-05-31

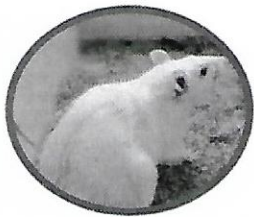

**NSHM College of Pharmaceutical Technology**  
Kolkata – 700 053.

**INSTITUTIONAL ANIMAL ETHICS COMMITTEE**

Regd. No: 1458/PO/a/11/CPCSEA

**Chairperson**

Dr. Subhasis Maity

**CPCSEA Nominee**

Dr. A. Sikdar

**Members**

Dr. Tapan k. Barman

Dr. Musfiqua Mookerjee

Dr. Tapan K. Chatterjee

Dr. Supriya Mana

**Social activist**

Dr. Kunal Bhattacharjee

**Veterinarian**

Dr. Sourav Banerjee

Ref.: HCG/Pharmacol/2019/05

Date: 10/04/2019

This is to certify that the thesis entitled "The investigation of Ruthenium-Phloretin complex in colon carcinoma: a molecular approach" and related experimental work will be carried out through the animals subjected to the guidelines set by animal welfare division, Ministry of Environment, Govt. of India throughout this study. 60 mice and 35 rats have been approved for experimental purposes. The guidelines for the care and the use of laboratory animals were strictly followed during the experiment and approved by the Institutional Animal Ethical Committee (IAEC).

Chairperson

Institutional Animal Ethics Committee  
NSHM College of Pharmaceutical Technology

A division of HCG Charitable Trust

60 (124) BL Saha Road, Kolkata – 700 053, Phone - +91332403 2152 / 2300 / 01

## Pro Caspase-3 Full Western Blot

Con 36.56 $\mu$ m 73.13  $\mu$ m 109.69  $\mu$ m

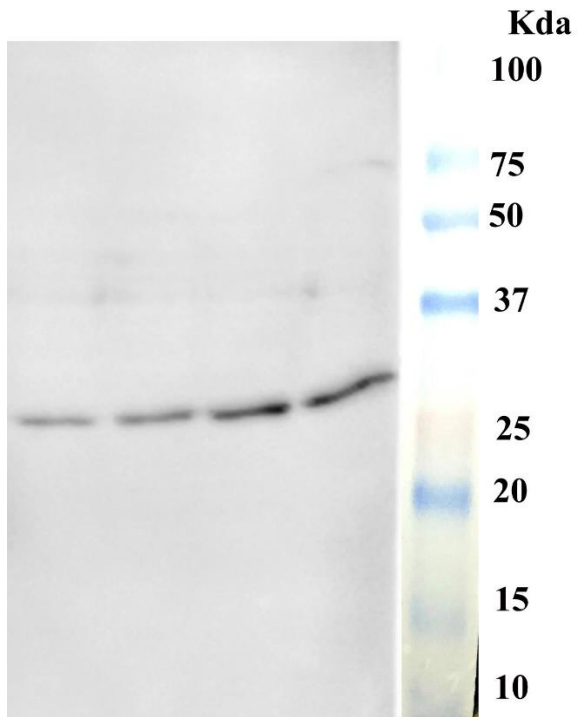

# Active Caspase-3 Full Western Blot

Con 36.56 $\mu$ m 73.13  $\mu$ m 109.69  $\mu$ m

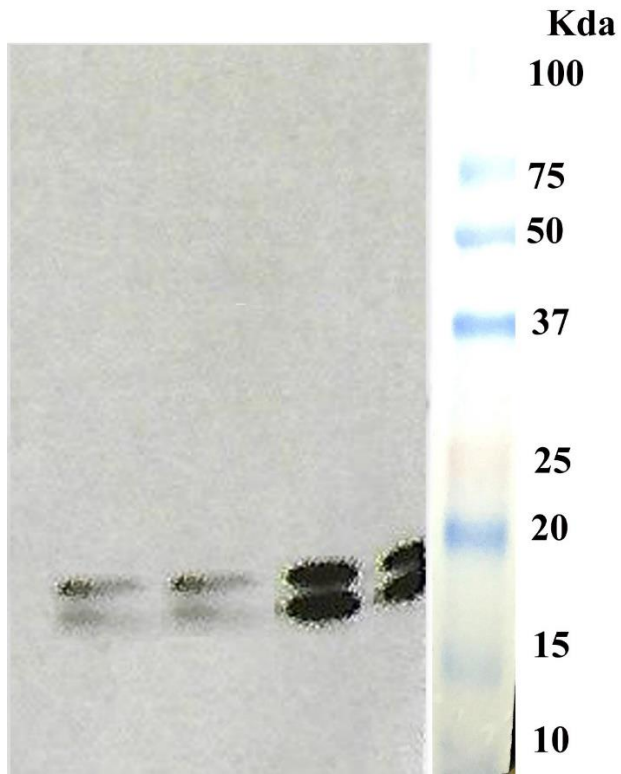

Supplement: f1 [file 7690845.f1.pdf]
